# Supplementary material for: SPAG5 is a potential therapeutic target affecting proliferation, apoptosis, and invasion of esophageal cancer cells
Source: PubMed Central journal article supplement — Eur J Med Res. 2024 Dec 19;29:596. doi: 10.1186/s40001-024-02182-y (PMC11657553; doi:10.1186/s40001-024-02182-y), 2024-12-19

# Supplemental Figure 1

## (A) DSS

### Univariate Cox regression of SPAG5 in pan-cancer (DSS)

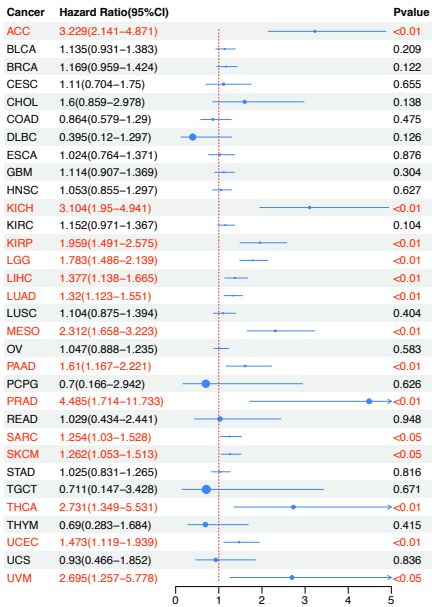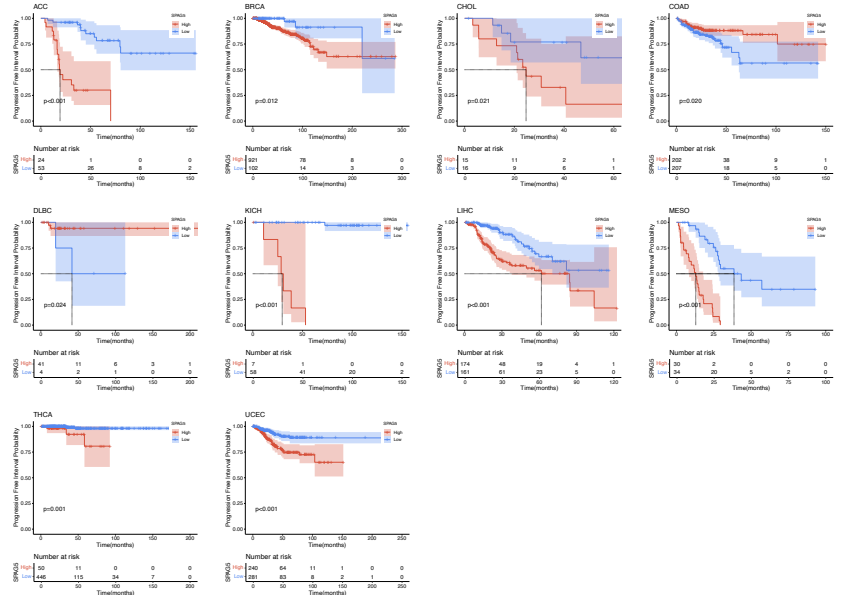

## (B) DFI

### Univariate Cox regression of SPAG5 in pan-cancer (DFI)

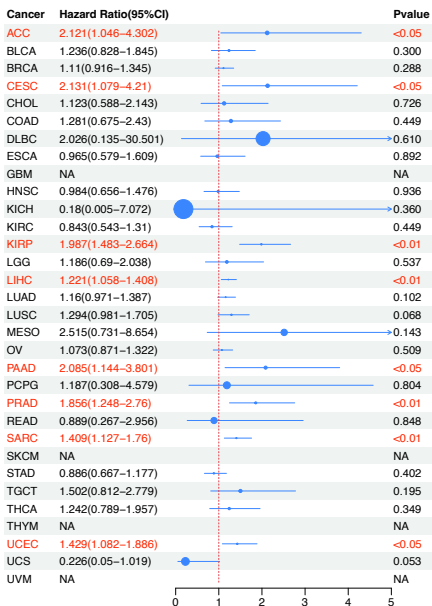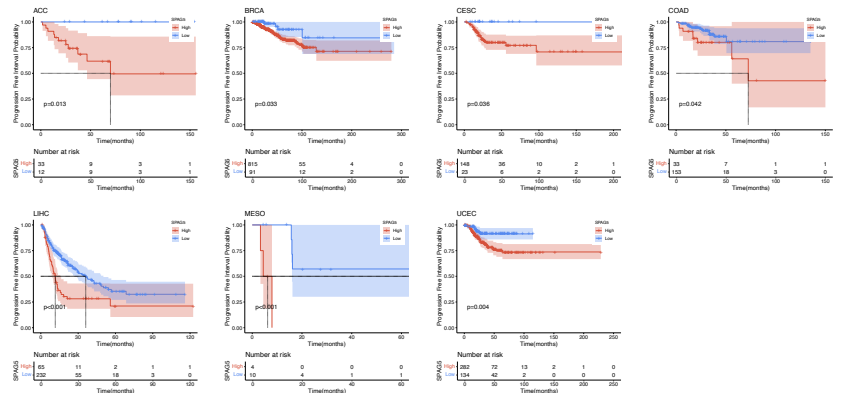

## (C) PFI

### Univariate Cox regression of SPAG5 in pan-cancer (PFI)

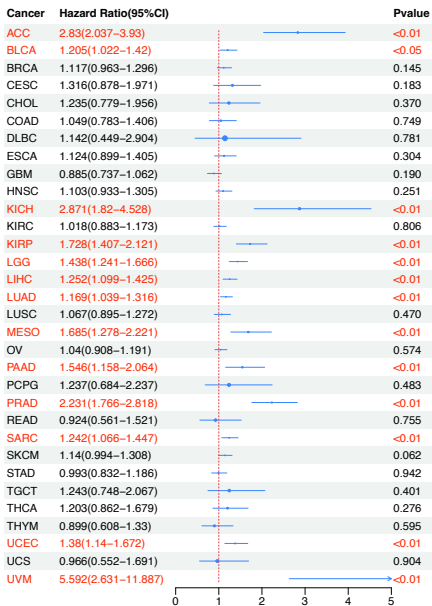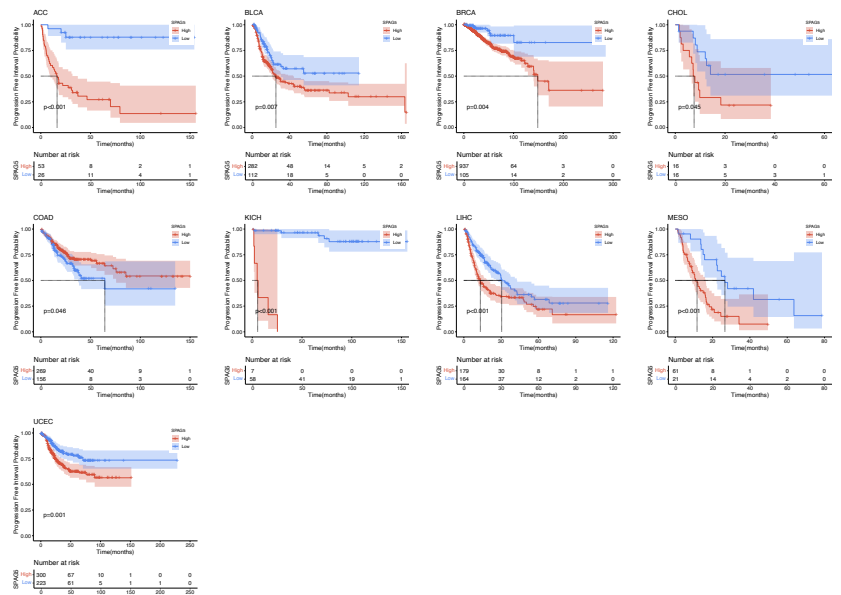

# Supplemental Figure 2

(A)

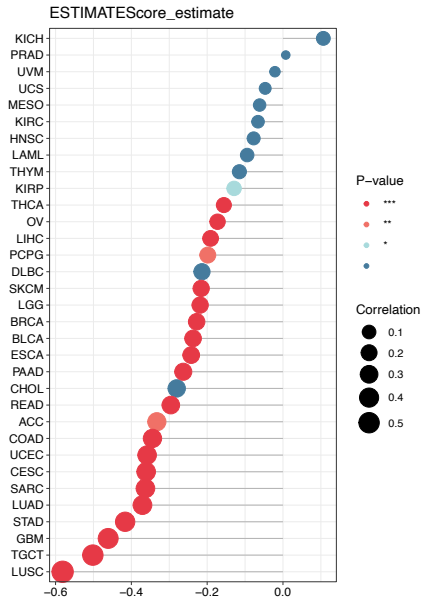

(B)

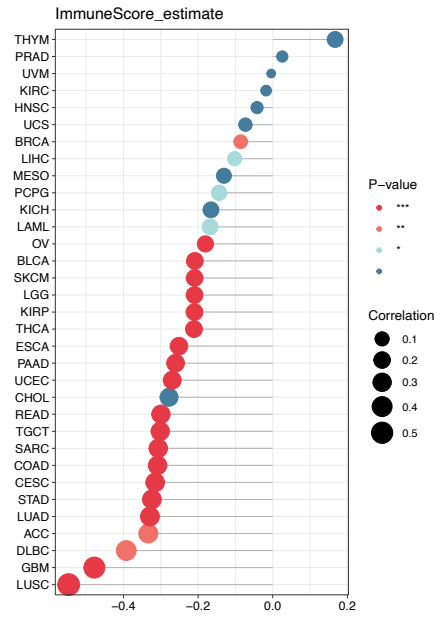

(C)

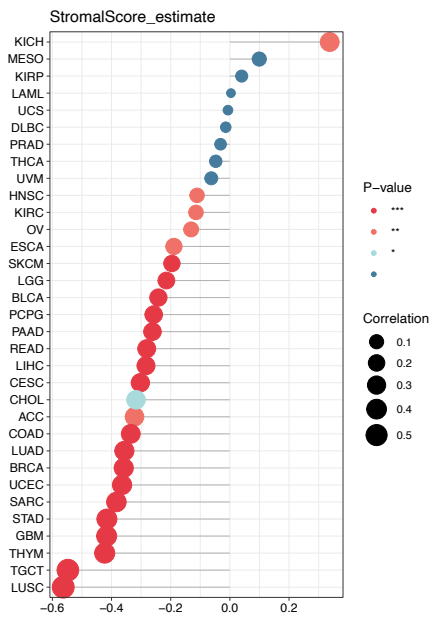

(D)

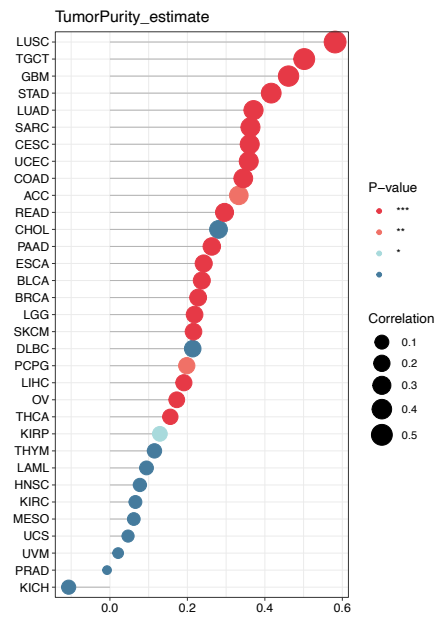

# Supplemental Figure 3

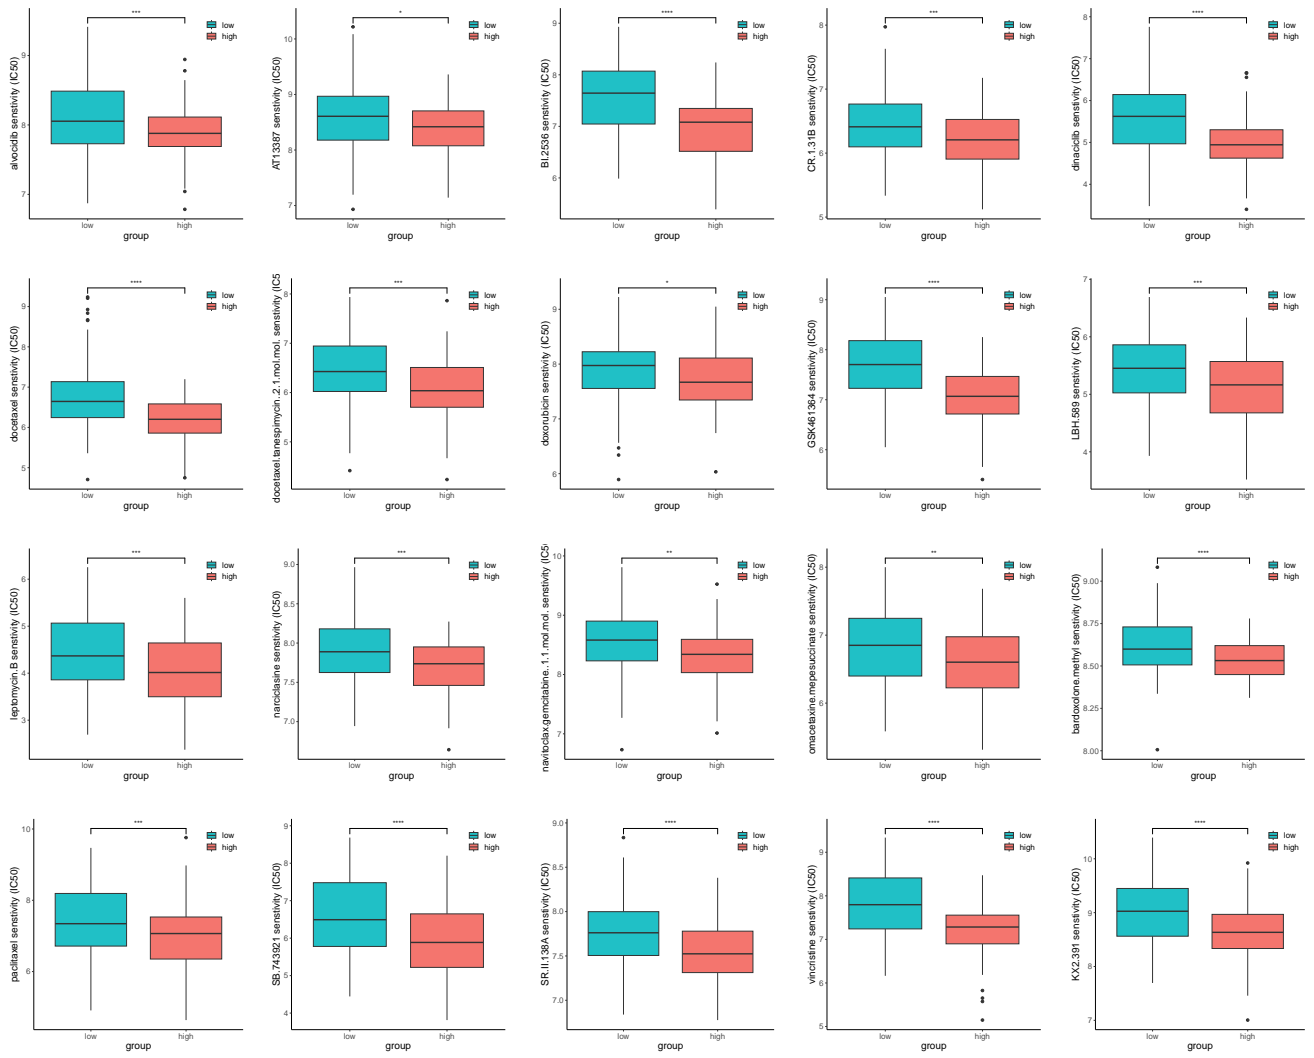

Supplement: 40001_2024_2182_MOESM1_ESM.pdf [file 40001_2024_2182_MOESM1_ESM.pdf]
